# Supplementary material for: Effect of Polyphenol-Rich Foods, Juices, and Concentrates on Recovery from Exercise Induced Muscle Damage: A Systematic Review and Meta-Analysis
Source: MDPI journal article supplement (doi:10.3390/nu13092988), 2021-08-27
Supplement: s1 [file s1]

Supplementary File 3 Quality assessment

| Outcomes              | No of studies (Design)         | Limitations                                                              | Inconsistency                      | Indirectness            | Imprecision                                                   | Publication bias | SMD [95% CI]         | No of participants                | Quality of the evidence (GRADE) |
|-----------------------|--------------------------------|--------------------------------------------------------------------------|------------------------------------|-------------------------|---------------------------------------------------------------|------------------|----------------------|-----------------------------------|---------------------------------|
| MIVC immediately post | 14 (4 crossover; 10 parallel)  | Serious limitations (3 high risk of bias, 11 some concerns) <sup>a</sup> | No serious inconsistency           | No serious indirectness | Serious imprecision (less than 400 participants) <sup>b</sup> | Undetected       | 0.23 [0.04, 0.42]    | 370 (203 polyphenol; 167 placebo) | ⊕⊕○○<br>Low                     |
| MIVC 24 hrs post      | 19 (7 crossover; 12 parallel)  | Serious limitations (7 high risk of bias, 12 some concerns) <sup>a</sup> | Serious inconsistency <sup>d</sup> | No serious indirectness | No serious imprecision                                        | Undetected       | 0.39 [0.15, 0.62]    | 466 (251 polyphenol; 215 placebo) | ⊕⊕○○<br>Low                     |
| MIVC 48 hrs post      | 19 (7 crossover; 12 parallel)  | Serious limitations (7 high risk of bias, 12 some concerns) <sup>a</sup> | No serious inconsistency           | No serious indirectness | No serious imprecision                                        | Undetected       | 0.48 [0.28, 0.67]    | 466 (251 polyphenol; 215 placebo) | ⊕⊕⊕○<br>Moderate                |
| MIVC 72 hrs post      | 13 (4 crossover; 9 parallel)   | Serious limitations (4 high risk of bias, 9 some concerns) <sup>a</sup>  | No serious inconsistency           | No serious indirectness | Serious imprecision (less than 400 participants) <sup>b</sup> | Undetected       | 0.29 [0.11, 0.46]    | 338 (187 polyphenol; 151 placebo) | ⊕⊕○○<br>Low                     |
| MIVC 96 hrs post      | 5 (2 crossover; 3 parallel)    | Serious limitations (2 high risk of bias, 3 some concerns) <sup>a</sup>  | Serious inconsistency <sup>d</sup> | No serious indirectness | Serious imprecision (less than 400 participants) <sup>b</sup> | Undetected       | 0.50 [0.16, 0.83]    | 170 (98 polyphenol; 72 placebo)   | ⊕○○○<br>Very Low                |
| DOMS immediately post | 15 (4 crossover; 11 parallel)  | Serious limitations (3 high risk of bias, 12 some concerns) <sup>a</sup> | Serious inconsistency <sup>d</sup> | No serious indirectness | No serious imprecision                                        | Undetected       | -0.23 [-0.53, 0.07]  | 414 (226 polyphenol; 188 placebo) | ⊕⊕○○<br>Low                     |
| DOMS 24 hrs post      | 24 (10 crossover; 14 parallel) | Serious limitations (9 high risk of bias, 15 some concerns) <sup>a</sup> | Serious inconsistency <sup>d</sup> | No serious indirectness | No serious imprecision                                        | Undetected       | -0.29 [-0.47, -0.11] | 567 (302 polyphenol; 265 placebo) | ⊕⊕○○<br>Low                     |
| DOMS 48 hrs post      | 24 (10 crossover; 14 parallel) | Serious limitations (9 high risk of bias, 15 some concerns) <sup>a</sup> | Serious inconsistency <sup>d</sup> | No serious indirectness | No serious imprecision                                        | Undetected       | -0.28 [-0.46, -0.09] | 567 (302 polyphenol; 265 placebo) | ⊕⊕○○<br>Low                     |
| DOMS 72 hrs post      | 16 (6 crossover; 10 parallel)  | Serious limitations (5 high risk of bias, 11 some concerns) <sup>a</sup> | Serious inconsistency <sup>d</sup> | No serious indirectness | Serious imprecision (less than 400 participants) <sup>b</sup> | Undetected       | -0.46 [-0.69, -0.24] | 396 (217 polyphenol; 179 placebo) | ⊕○○○<br>Very Low                |

|                      |                              |                                                                         |                                    |                         | participants and CI) <sup>c</sup>                             |            |                     |                                   |               |
|----------------------|------------------------------|-------------------------------------------------------------------------|------------------------------------|-------------------------|---------------------------------------------------------------|------------|---------------------|-----------------------------------|---------------|
| DOMS 96 hrs post     | 5 (2 crossover; 3 parallel)  | Serious limitations (2 high risk of bias, 3 some concerns) <sup>a</sup> | No serious inconsistency           | No serious indirectness | Serious imprecision (less than 400 participants) <sup>b</sup> | Undetected | -0.10 [-0.30, 0.10] | 158 (93 polyphenol; 65 placebo)   | ⊕⊕○○ Low      |
| CMJ immediately post | 8 (2 crossover; 6 parallel)  | Serious limitations (1 high risk of bias, 4 some concerns) <sup>a</sup> | No serious inconsistency           | No serious indirectness | Serious imprecision (less than 400 participants) <sup>b</sup> | Undetected | 0.27 [0.01, 0.53]   | 190 (100 polyphenol; 90 placebo)  | ⊕⊕○○ Low      |
| CMJ 24 hrs post      | 10 (3 crossover; 7 parallel) | Serious limitations (2 high risk of bias, 8 some concerns) <sup>a</sup> | Serious inconsistency <sup>d</sup> | No serious indirectness | Serious imprecision (less than 400 participants) <sup>b</sup> | Undetected | 0.47 [0.11, 0.83]   | 216 (118 polyphenol; 108 placebo) | ⊕○○○ Very Low |
| CMJ 48 hrs post      | 11 (4 crossover; 7 parallel) | Serious limitations (3 high risk of bias, 8 some concerns) <sup>a</sup> | Serious inconsistency <sup>d</sup> | No serious indirectness | Serious imprecision (less than 400 participants) <sup>b</sup> | Undetected | 0.58 [0.24, 0.91]   | 248 (129 polyphenol; 119 placebo) | ⊕○○○ Very Low |
| CMJ 72 hrs post      | 7 (2 crossover; 5 parallel)  | Serious limitations (1 high risk of bias, 6 some concerns) <sup>a</sup> | Serious inconsistency <sup>d</sup> | No serious indirectness | Serious imprecision (less than 400 participants) <sup>b</sup> | Undetected | 0.57 [0.03, 1.10]   | 152 (81 polyphenol; 71 placebo)   | ⊕○○○ Very Low |

<sup>a</sup> Serious risk of bias for MIVC, DOMS and CMJ at every post-exercise time point.

<sup>b</sup> Serious imprecision for less than 400 participants

<sup>c</sup> Serious imprecision for less than 400 participants and 95% CI overlap with a small effect size of 0.2 for beneficial and detrimental effects

<sup>d</sup> Serious inconsistency when heterogeneity  $I^2$  was greater than 40%
