# Supplementary material for: Effect of Polyphenol-Rich Foods, Juices, and Concentrates on Recovery from Exercise Induced Muscle Damage: A Systematic Review and Meta-Analysis
Source: MDPI journal article supplement (doi:10.3390/nu13092988), 2021-08-27
Supplement: s1 [file s1]

Supplementary File 9. Analyses by individual polyphenols

Table S1. Effect of individual polyphenol-rich foods, juices and concentrates on maximal voluntary isometric contraction (MIVC)

| MIVC             | Cherry                                             | POM                                                | Cocoa                                             | Beetroot                                           |
|------------------|----------------------------------------------------|----------------------------------------------------|---------------------------------------------------|----------------------------------------------------|
| Immediately post | 0.31 (-0.06, 0.68); P = 0.10, I <sup>2</sup> = 0%  | 0.03 (-0.33, 0.40); P = 0.85, I <sup>2</sup> = 0%  |                                                   | 0.29 (-0.04, 0.62); P = 0.08, I <sup>2</sup> = 0%  |
| 24 hrs           | 0.59 (0.06, 1.12); P = 0.03, I <sup>2</sup> = 64%  | 0.27 (-0.04, 0.58); P = 0.08, I <sup>2</sup> = 0%  | 0.03 (-0.42, 0.48); P = 0.91, I <sup>2</sup> = 0% | 0.41 (-0.17, 0.99); P = 0.17, I <sup>2</sup> = 62% |
| 48 hrs           | 0.67 (0.23, 1.11); P = 0.003, I <sup>2</sup> = 50% | 0.23 (-0.15, 0.61); P = 0.24, I <sup>2</sup> = 29% | 0.50 (0.09, 0.91); P = 0.02, I <sup>2</sup> = 0%  | 0.34 (-0.06, 0.75); P = 0.10, I <sup>2</sup> = 29% |
| 72 hrs           | 0.41 (-0.08, 0.90); P = 0.10, I <sup>2</sup> = 38% | 0.21 (-0.04, 0.46); P = 0.10, I <sup>2</sup> = 0%  |                                                   | 0.28 (-0.09, 0.64); P = 0.14, I <sup>2</sup> = 0%  |
| 96 hrs           | 0.79 (-0.38, 1.95); P = 0.19, I <sup>2</sup> = 77% | 0.37 (0.11, 0.63); P = 0.006, I <sup>2</sup> = 0%  |                                                   |                                                    |

Data presented as SMD (95% CI)

Table S2. Effect of individual polyphenol-rich foods, juices and concentrates on delayed onset muscle soreness (DOMS)

| DOMS             | Cherry                                                | POM                                                | Cocoa                                               | Beetroot                                             |
|------------------|-------------------------------------------------------|----------------------------------------------------|-----------------------------------------------------|------------------------------------------------------|
| Immediately post | -0.32 (-0.92, 0.28); P = 0.30, I <sup>2</sup> = 75    | 0.14 (-0.31, 0.59); P = 0.54, I <sup>2</sup> = 37% |                                                     | -0.42 (-0.90, 0.07); P = 0.09, I <sup>2</sup> = 48%  |
| 24 hrs           | -0.27 (-0.55, 0.00); P = 0.05, I <sup>2</sup> = 46%   | 0.16 (-0.40, 0.72); P = 0.58, I <sup>2</sup> = 73% | -0.23 (-0.89, 0.43); P = 0.50, I <sup>2</sup> = 67% | -0.62 (-1.19, -0.06); P = 0.03, I <sup>2</sup> = 60% |
| 48 hrs           | -0.24 (-0.58, 0.10); P = 0.17, I <sup>2</sup> = 59%   | 0.09 (-0.53, 0.72); P = 0.77, I <sup>2</sup> = 78% | -0.17 (-0.50, 0.17); P = 0.33, I <sup>2</sup> = 0%  | -0.56 (-0.89, -0.22); P = 0.001, I <sup>2</sup> = 0% |
| 72 hrs           | -0.58 (-0.83, -0.33); P < 0.001, I <sup>2</sup> = 64% | -0.22 (-0.48, 0.03); P = 0.09, I <sup>2</sup> = 0% |                                                     | -0.70 (-1.10, -0.31); P < 0.001, I <sup>2</sup> = 0% |
| 96 hrs           | -0.15 (-0.49, 0.19); P = 0.40, I <sup>2</sup> = 0%    | -0.08 (-0.34, 0.17); P = 0.51, I <sup>2</sup> = 0% |                                                     |                                                      |

Data presented as SMD (95% CI)

Table S3. Effect of individual polyphenol-rich foods, juices and concentrates on counter movement jump (CMJ)

| CMJ              | Cherry                                             | POM | Cocoa | Beetroot                                          |
|------------------|----------------------------------------------------|-----|-------|---------------------------------------------------|
| Immediately post | 0.51 (-0.12, 1.14); P = 0.11, I <sup>2</sup> = 0%  |     |       | 0.25 (-0.08, 0.58); P = 0.13, I <sup>2</sup> = 0% |
| 24 hrs           | 0.82 (-0.26, 1.90); P = 0.14, I <sup>2</sup> = 87% |     |       | 0.34 (0.04, 0.65); P = 0.03, I <sup>2</sup> = 0%  |
| 48 hrs           | 0.72 (0.11, 1.32); P = 0.02, I <sup>2</sup> = 84%  |     |       | 0.46 (0.12, 0.81); P = 0.009, I <sup>2</sup> = 0% |
| 72 hrs           | 0.65 (-0.55, 1.86); P = 0.29, I <sup>2</sup> = 87% |     |       | 0.49 (0.07, 0.90); P = 0.02, I <sup>2</sup> = 22% |

Data presented as SMD (95% CI)

Table S4. Subgroup Analyses comparing individual polyphenol-rich foods, juices and concentrates on maximal voluntary isometric contraction (MIVC)

| MIVC        | Tart Cherry | Pomegranate                                                                                         | Beetroot                                                                       | Cocoa                                  |
|-------------|-------------|-----------------------------------------------------------------------------------------------------|--------------------------------------------------------------------------------|----------------------------------------|
|             |             | Post (P = 0.30)<br>24 hrs (P = 0.31)<br>48 hrs (P = 0.14)<br>72 hrs (P = 0.48)<br>96 hrs (P = 0.50) | Post (P = 0.94)<br>24 hrs (P = 0.65)<br>48 hrs (P = 0.28)<br>72 hrs (P = 0.67) | 24 hrs (P = 0.11)<br>48 hrs (P = 0.58) |
| Tart Cherry |             |                                                                                                     |                                                                                |                                        |
|             |             |                                                                                                     | Post (P = 0.31)<br>24 hrs (P = 0.68)<br>48 hrs (P = 0.68)<br>72 hrs (P = 0.77) | 24 hrs (P = 0.38)<br>48 hrs (P = 0.33) |
| Pomegranate |             |                                                                                                     |                                                                                |                                        |
|             |             |                                                                                                     |                                                                                | 24 hrs (P = 0.30)<br>48 hrs (P = 0.59) |
| Beetroot    |             |                                                                                                     |                                                                                |                                        |
| Cocoa       |             |                                                                                                     |                                                                                |                                        |

Table S5. Subgroup Analyses comparing individual polyphenol-rich foods, juices and concentrates on delayed onset muscle soreness (DOMS)

| DOMS        | Tart Cherry | Pomegranate                                                                                         | Beetroot                                                                       | Cocoa                                  |
|-------------|-------------|-----------------------------------------------------------------------------------------------------|--------------------------------------------------------------------------------|----------------------------------------|
| Tart Cherry |             | Post (P = 0.23)<br>24 hrs (P = 0.17)<br>48 hrs (P = 0.36)<br>72 hrs (P = 0.05)<br>96 hrs (P = 0.77) | Post (P = 0.80)<br>24 hrs (P = 0.28)<br>48 hrs (P = 0.19)<br>72 hrs (P = 0.61) | 24 hrs (P = 0.91)<br>48 hrs (P = 0.76) |
| Pomegranate |             |                                                                                                     | Post (P = 0.10)<br>24 hrs (P = 0.05)<br>48 hrs (P = 0.07)<br>72 hrs (P = 0.05) | 24 hrs (P = 0.38)<br>48 hrs (P = 0.47) |
| Beetroot    |             |                                                                                                     |                                                                                | 24 hrs (P = 0.38)<br>48 hrs (P = 0.10) |
| Cocoa       |             |                                                                                                     |                                                                                |                                        |

Table S6. Subgroup Analyses comparing individual polyphenol-rich foods, juices and concentrates on countermovement jump (CMJ)

| CMJ         | Tart Cherry | Pomegranate | Beetroot                                                                       | Cocoa |
|-------------|-------------|-------------|--------------------------------------------------------------------------------|-------|
| Tart Cherry |             |             | Post (P = 0.47)<br>24 hrs (P = 0.41)<br>48 hrs (P = 0.48)<br>72 hrs (P = 0.80) |       |
| Pomegranate |             |             |                                                                                |       |
| Beetroot    |             |             |                                                                                |       |
| Cocoa       |             |             |                                                                                |       |
