# Supplementary material for: Effect of Polyphenol-Rich Foods, Juices, and Concentrates on Recovery from Exercise Induced Muscle Damage: A Systematic Review and Meta-Analysis
Source: MDPI journal article supplement (doi:10.3390/nu13092988), 2021-08-27
Supplement: s1 [file s1]

(A)

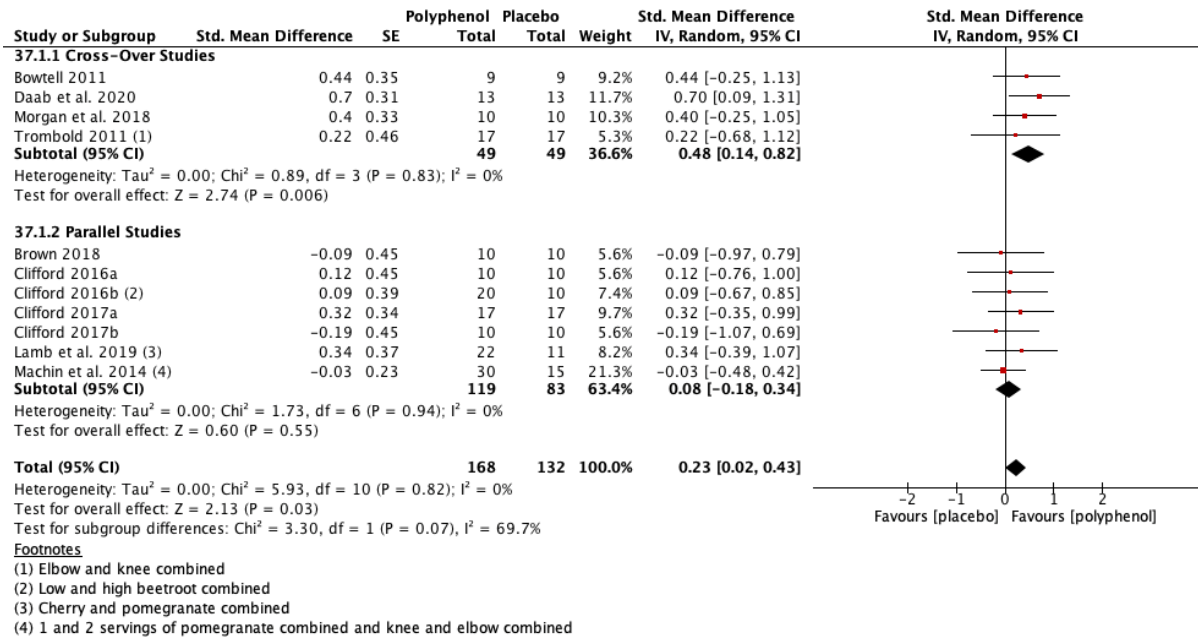

(B)

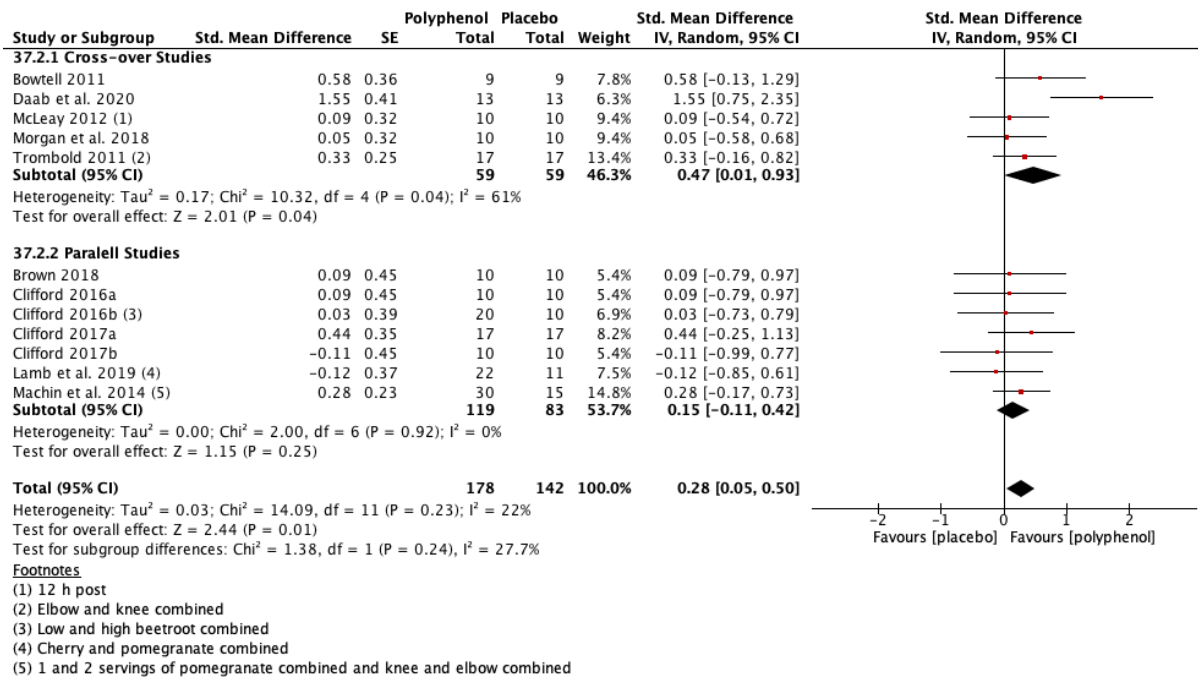

(C)

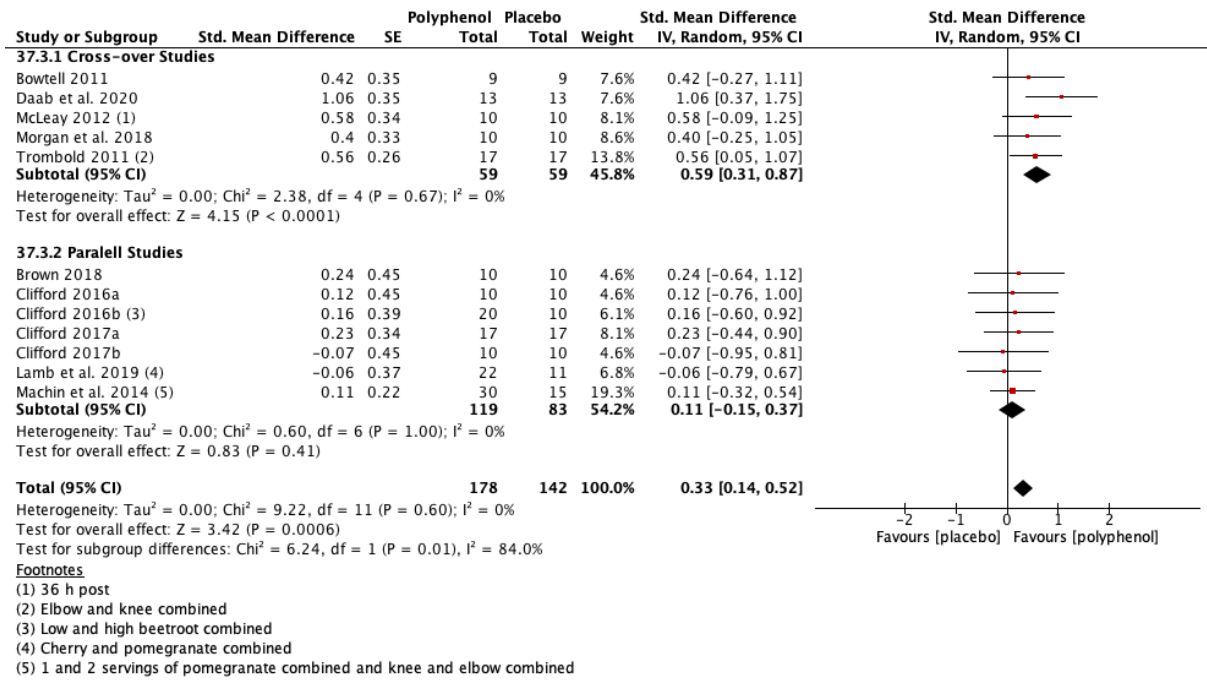

(D)

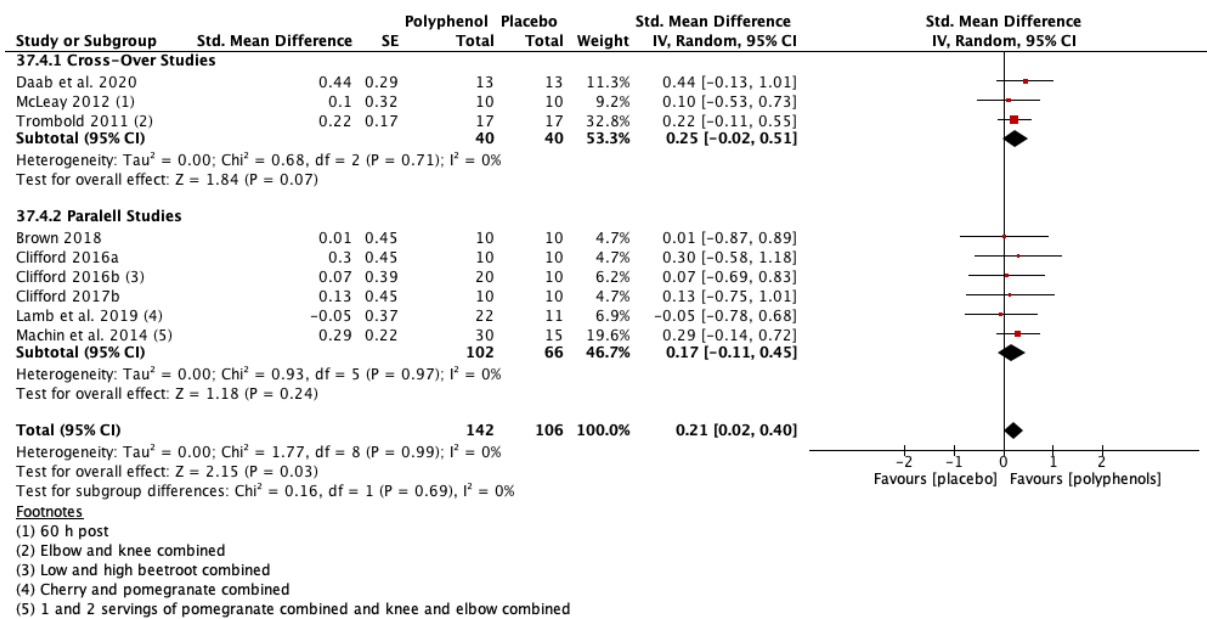

(E)

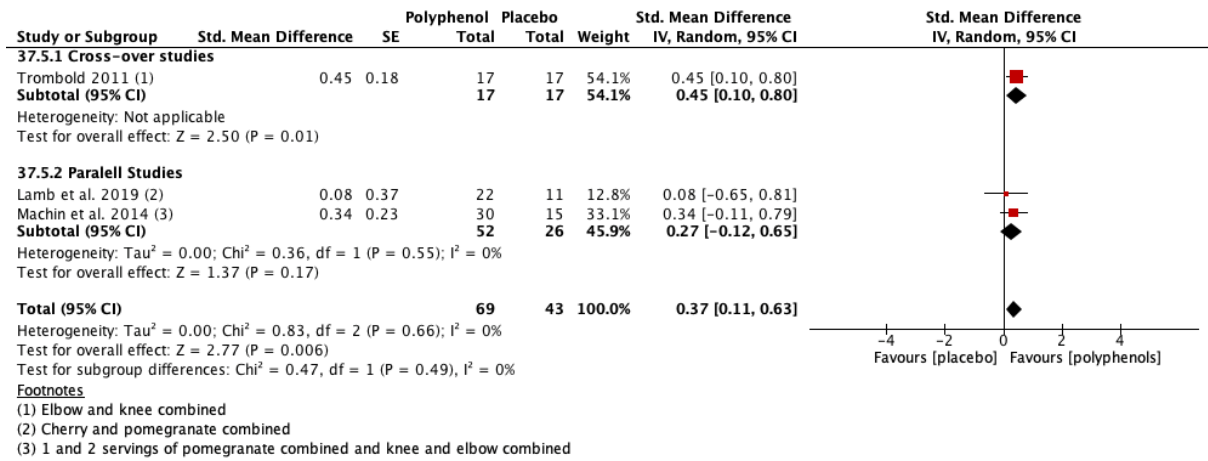

Supplementary Figure 4a. Sensitivity analysis: Effect of polyphenol-rich foods, juices and concentrates on recovery of maximal isometric voluntary contraction (A) immediately post-exercise; (B) 24 hours; (C) 48 hours; (D) 72 hours; (E) 96 hours after excluding 10 studies classified as high risk of bias.

(A)

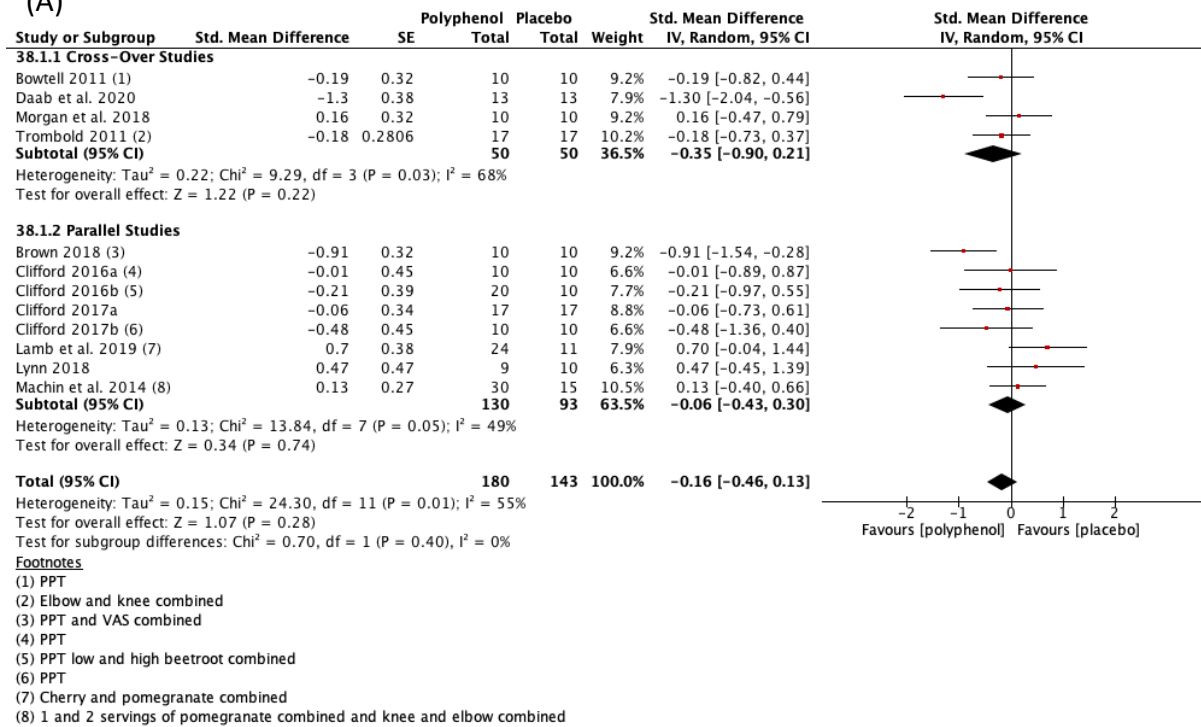

(B)

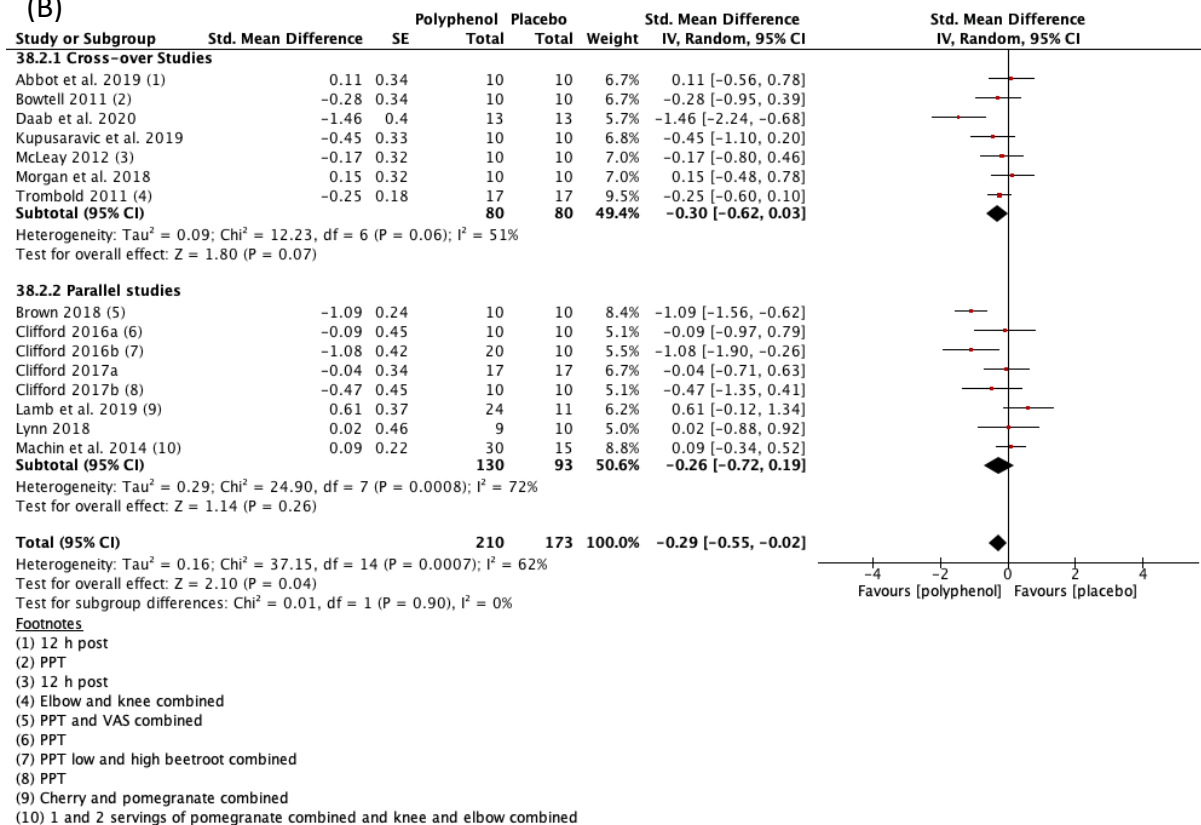

(C)

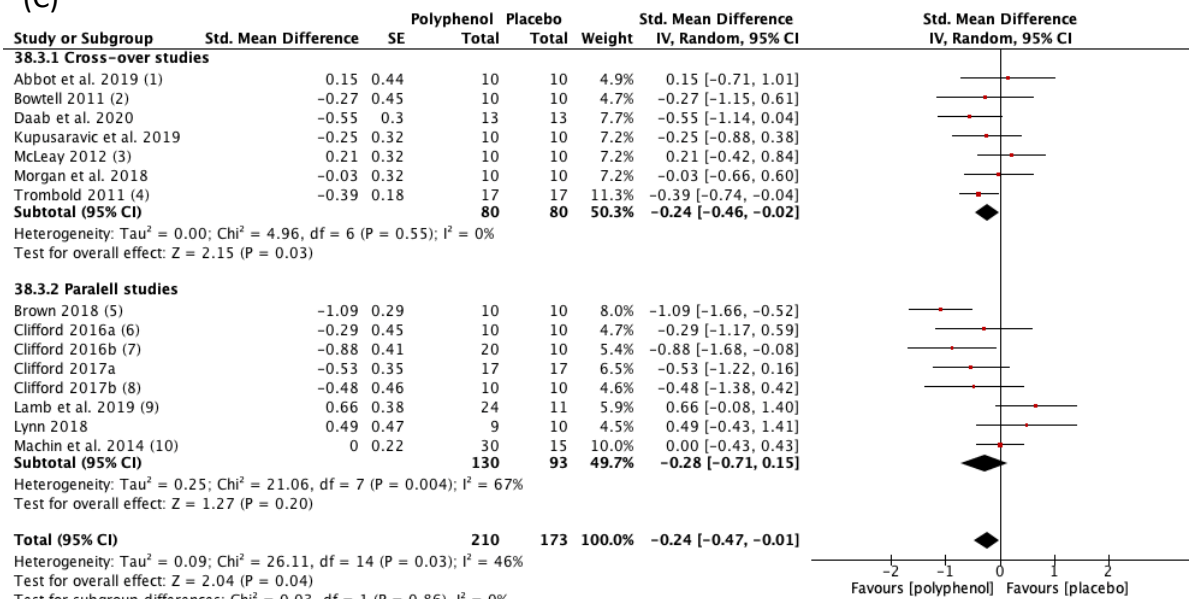**Footnotes**

- (1) 36 h post  
 (2) PPT  
 (3) 36 h post  
 (4) Elbow and knee combined  
 (5) PPT and VAS combined  
 (6) PPT  
 (7) PPT low and high beetroot combined  
 (8) PPT  
 (9) Cherry and pomegranate combined  
 (10) 1 and 2 servings of pomegranate combined and knee and elbow combined

(D)

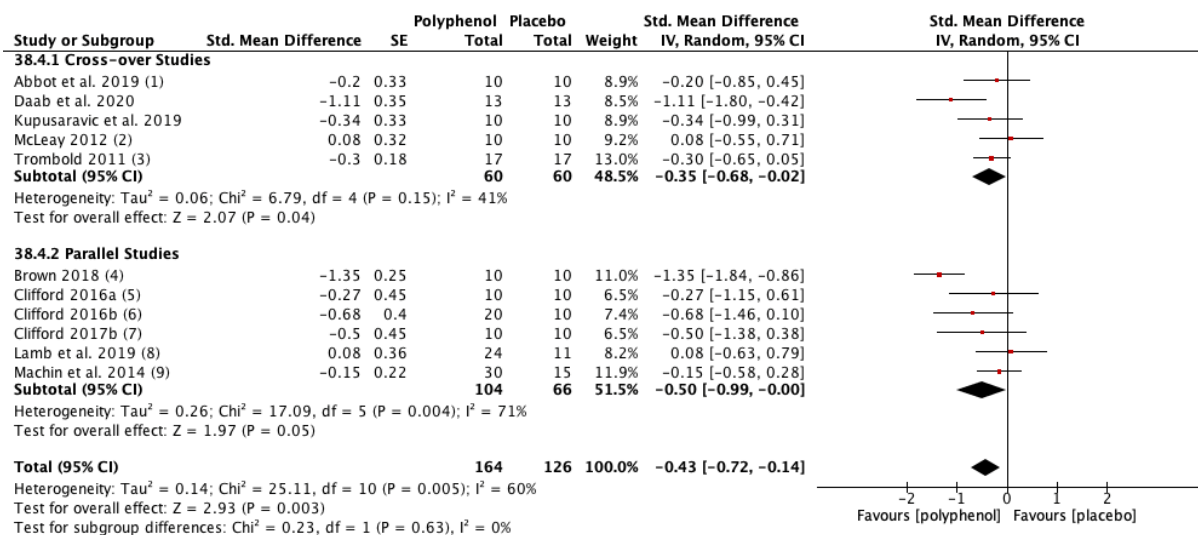**Footnotes**

- (1) 60 h post  
 (2) 60 h post  
 (3) Elbow and knee combined  
 (4) PPT and VAS combined  
 (5) PPT  
 (6) PPT low and high beetroot combined  
 (7) PPT  
 (8) Cherry and pomegranate combined  
 (9) 1 and 2 servings of pomegranate combined and knee and elbow combined

(E)

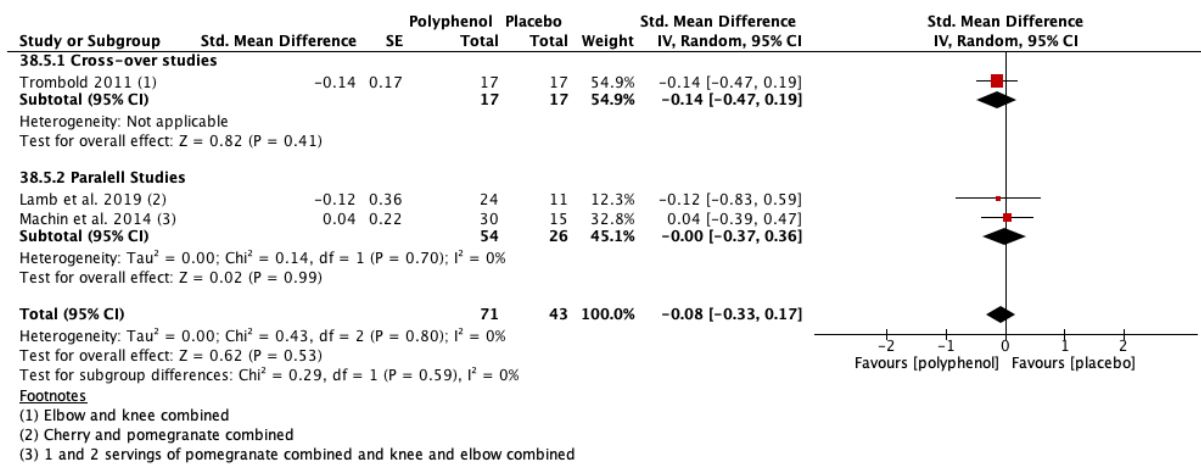

Supplementary Figure 4b. Sensitivity analysis: Effect of polyphenol-rich foods, juices and concentrates on recovery of delayed onset muscle soreness (A) immediately post-exercise; (B) 24 hours; (C) 48 hours; (D) 72 hours; (E) 96 hours after excluding 10 studies classified as high risk of bias.

PPT: Pain pressure threshold

VAS: Visual analogue scale

(A)

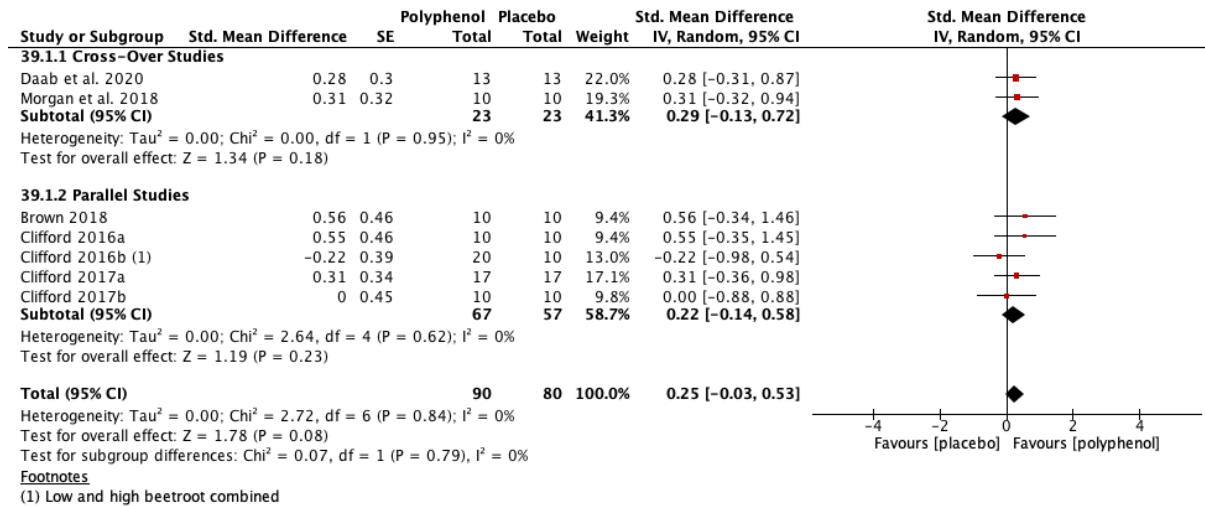

(B)

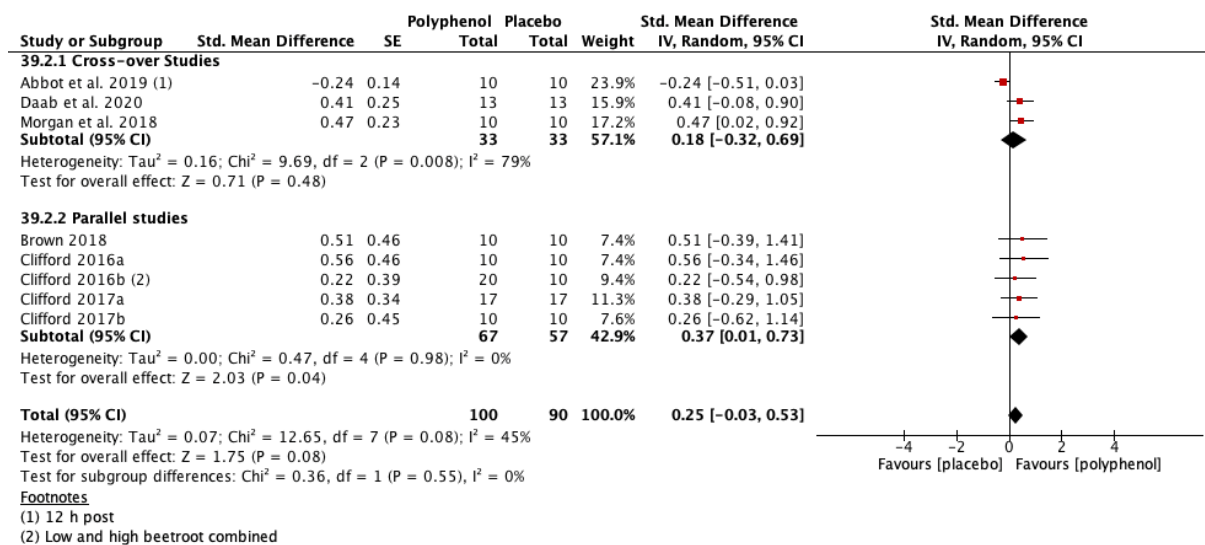

(C)

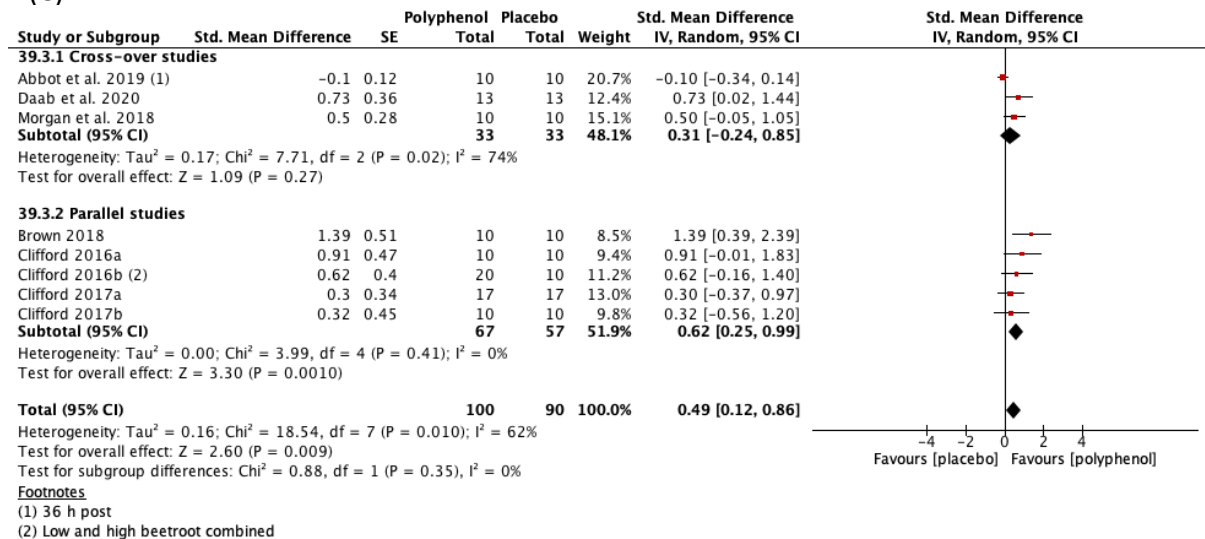

(D)

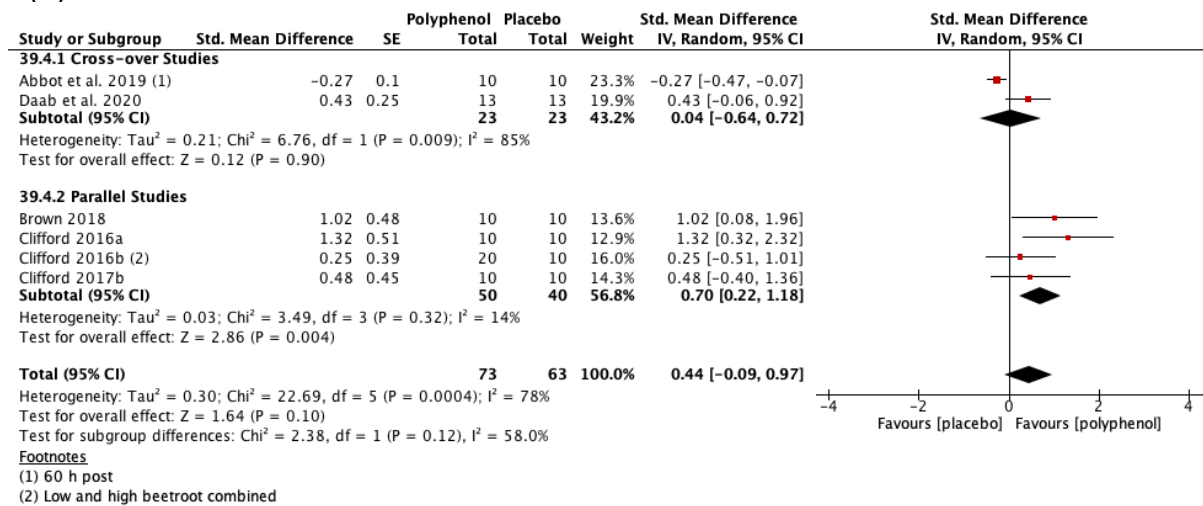

Supplementary Figure 4c. Sensitivity analysis: Effect of polyphenol-rich foods, juices and concentrates on recovery of countermovement jump (A) immediately post-exercise; (B) 24 hours; (C) 48 hours; (D) 72 hours after excluding 10 studies classified as high risk of bias.
