# Supplementary material for: Effect of Polyphenol-Rich Foods, Juices, and Concentrates on Recovery from Exercise Induced Muscle Damage: A Systematic Review and Meta-Analysis
Source: MDPI journal article supplement (doi:10.3390/nu13092988), 2021-08-27
Supplement: s1 [file s1]

(A)

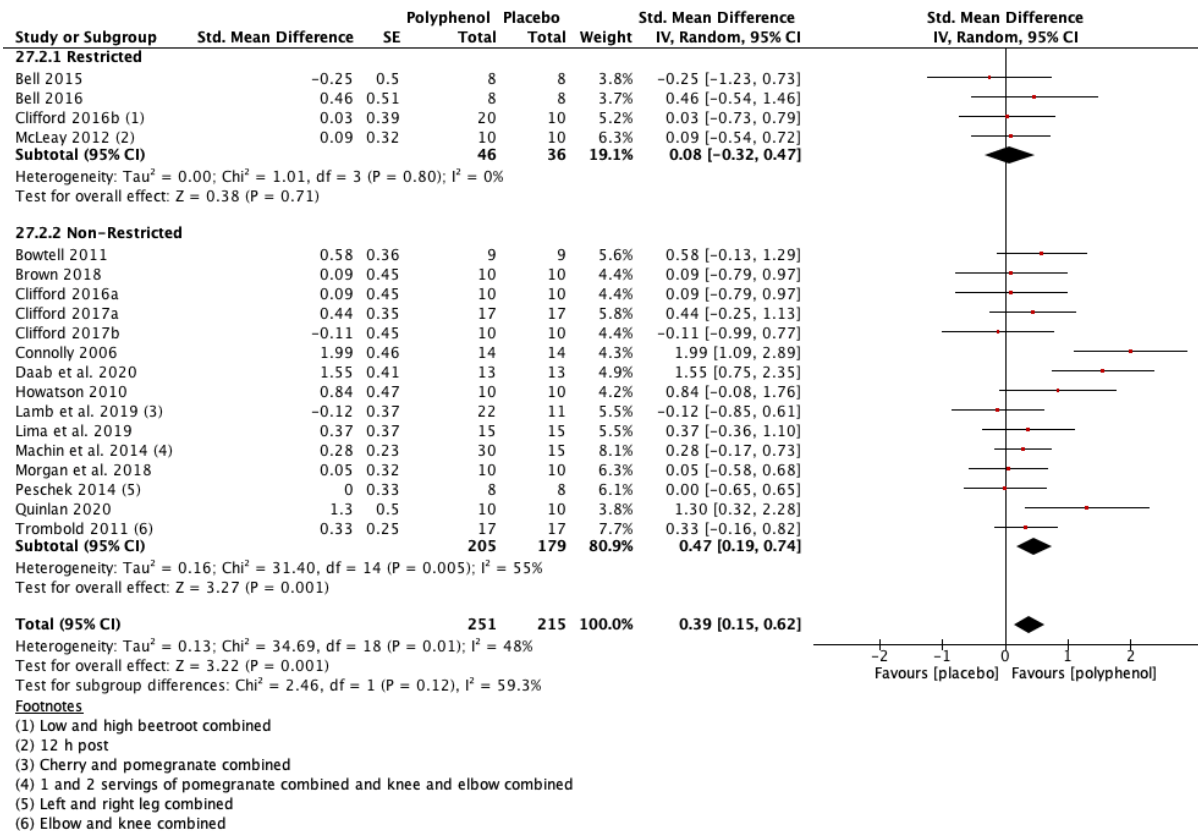

(B)

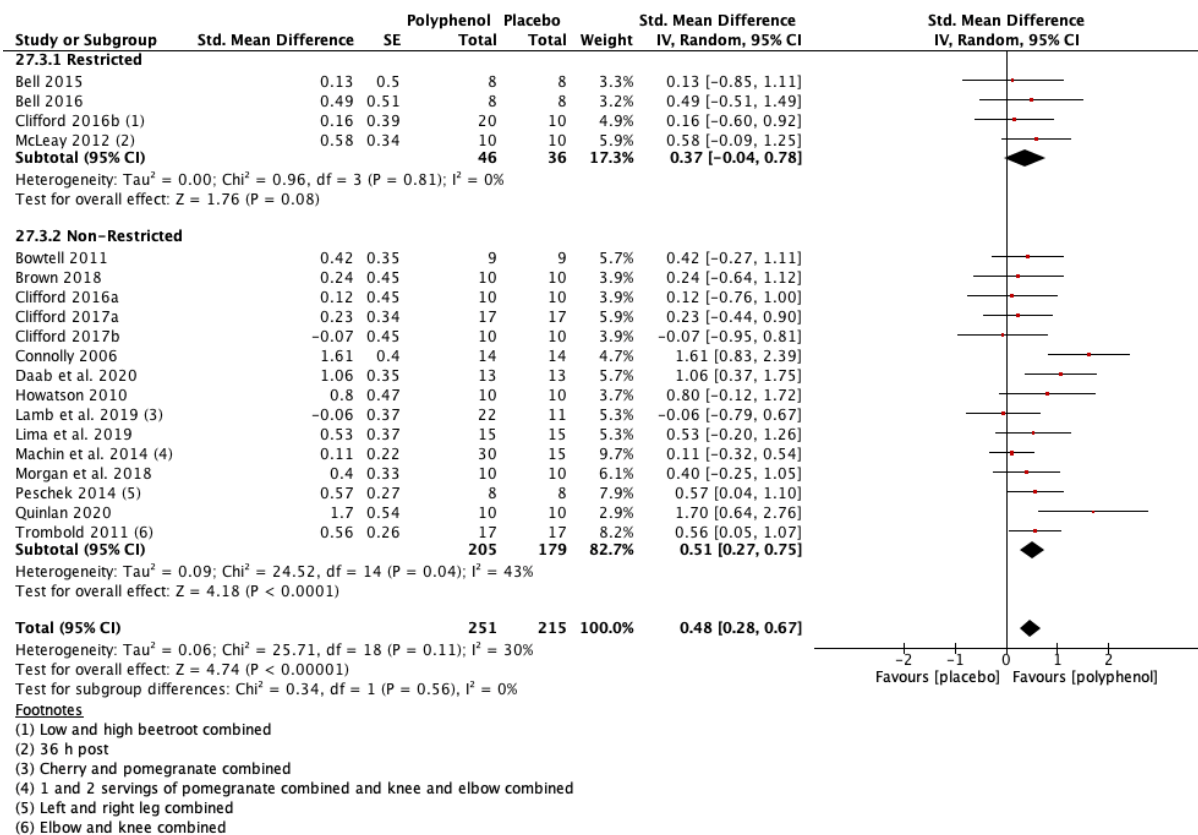

(C)

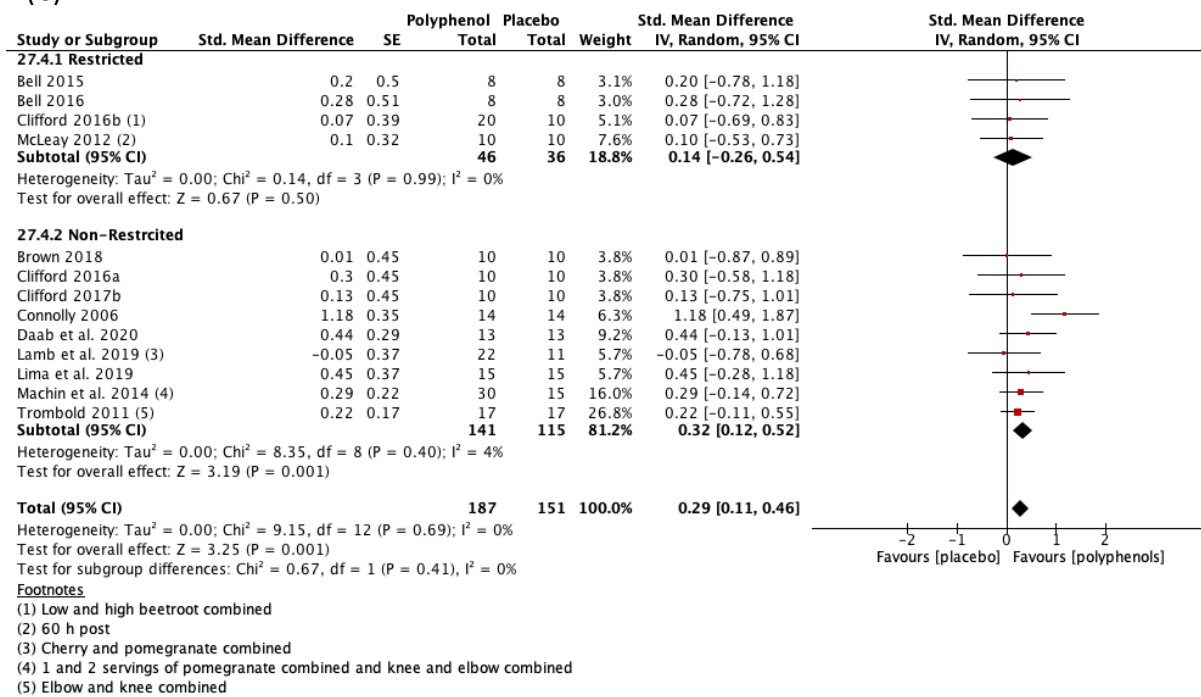

Supplementary Figure 10a. Comparison of studies based on restriction of dietary polyphenol intake: The effect of polyphenol-rich foods, juices and concentrates on recovery of maximal isometric voluntary contraction (A) 24 hours; (B) 48 hours; (C) 72 hours.

(A)

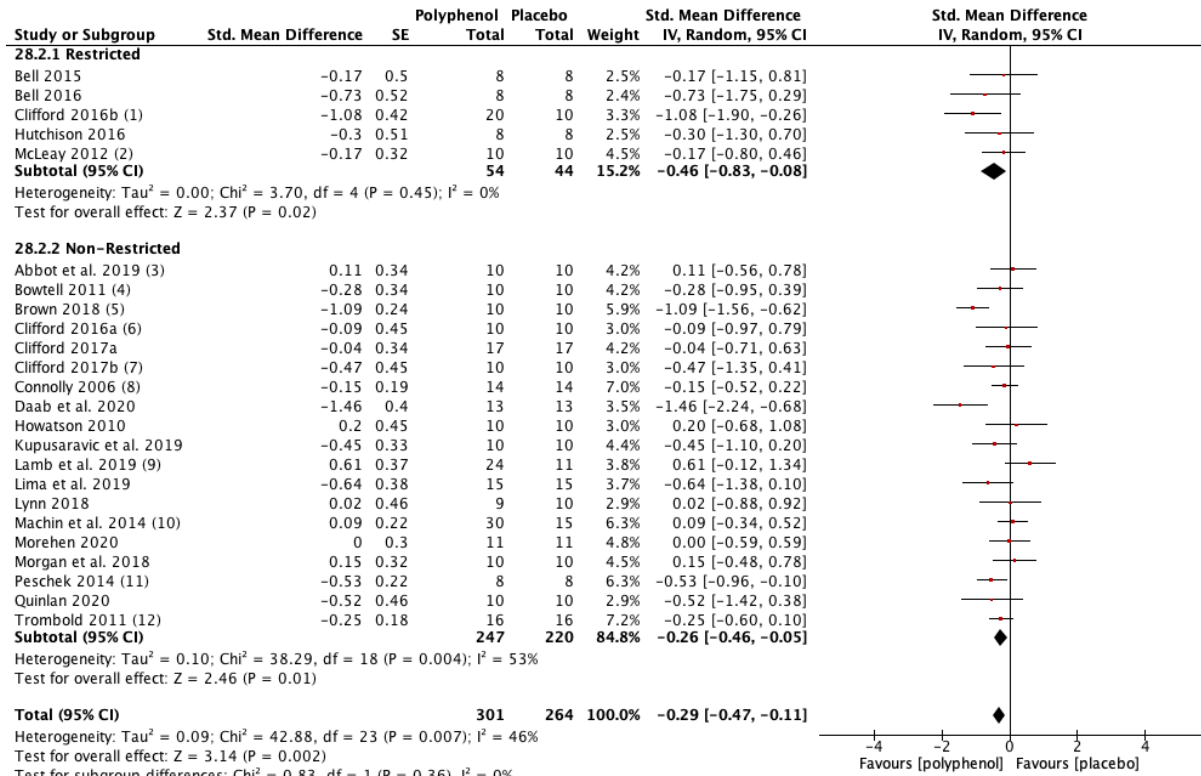**Footnotes**

- (1) PPT low and high beetroot combined
- (2) 12 h post
- (3) 12 h post
- (4) PPT
- (5) PPT and VAS combined
- (6) PPT
- (7) PPT
- (8) PPT and VAS combined
- (9) Cherry and pomegranate group combined
- (10) 1 and 2 servings of pomegranate combined and knee and elbow combined
- (11) PPT and VAS combined
- (12) Elbow and knee combined

(B)

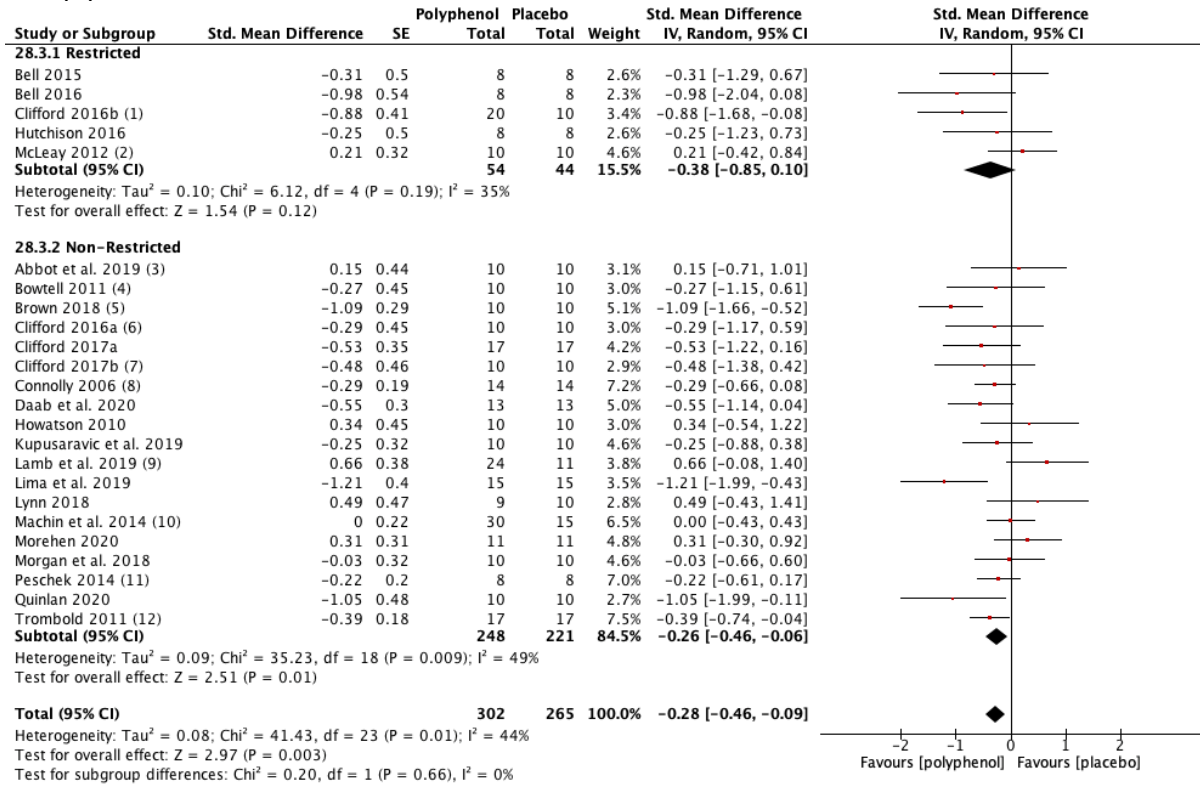**Footnotes**

- (1) PPT low and high beetroot combined
- (2) 36 h post
- (3) 36 h post
- (4) PPT
- (5) PPT and VAS combined
- (6) PPT
- (7) PPT
- (8) PPT and VAS combined
- (9) Cherry and pomegranate group combined
- (10) 1 and 2 servings of pomegranate combined and knee and elbow combined
- (11) PPT and VAS combined
- (12) Elbow and knee combined

(C)

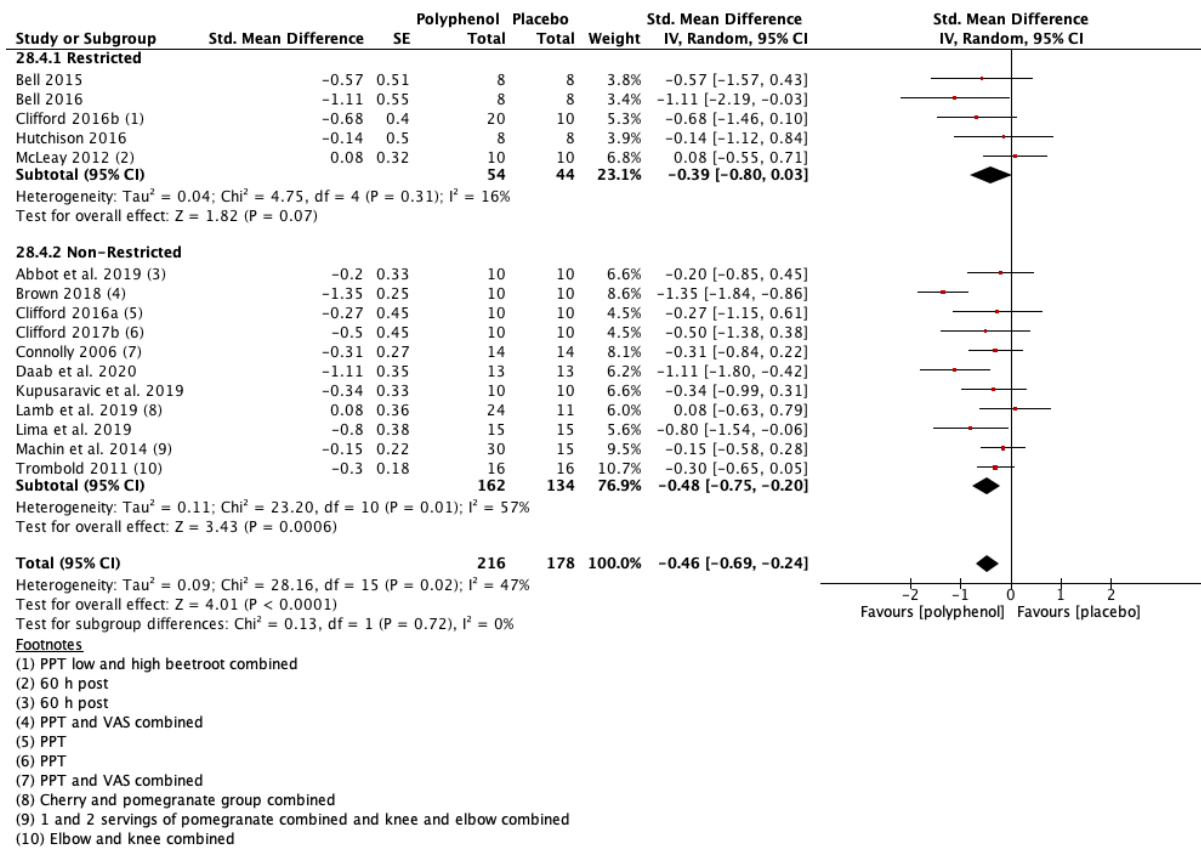

Supplementary Figure 10b. Comparison of studies based on restriction of dietary polyphenol intake: The effect of polyphenol-rich foods, juices and concentrates on delayed onset muscle soreness (A) 24 hours; (B) 48 hours; (C) 72 hours.

PPT: Pain pressure threshold

VAS: Visual analogue scale

(A)

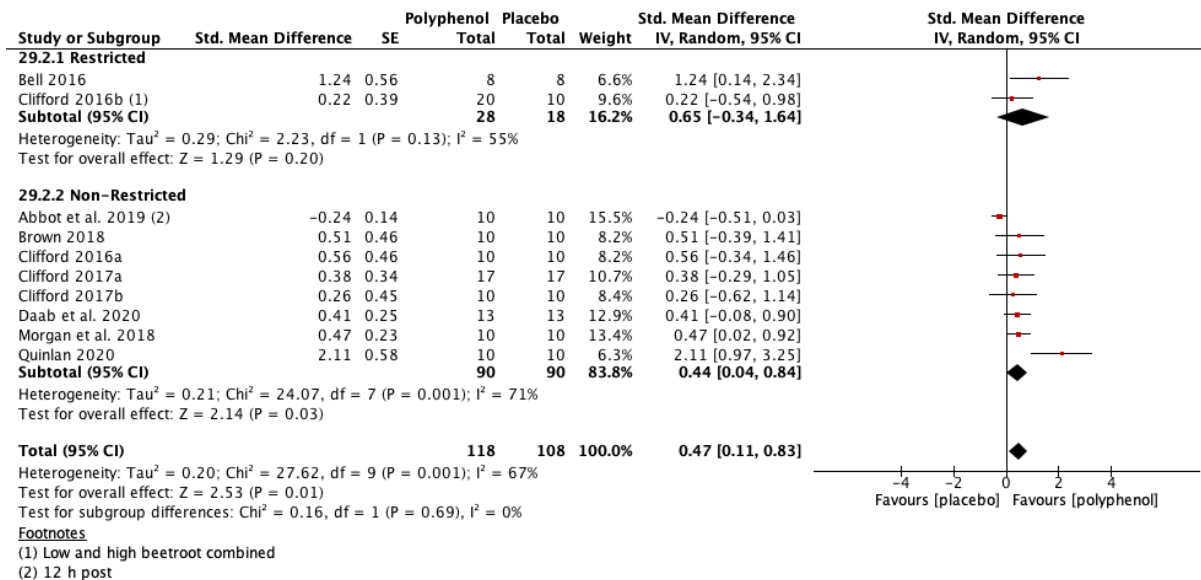

(B)

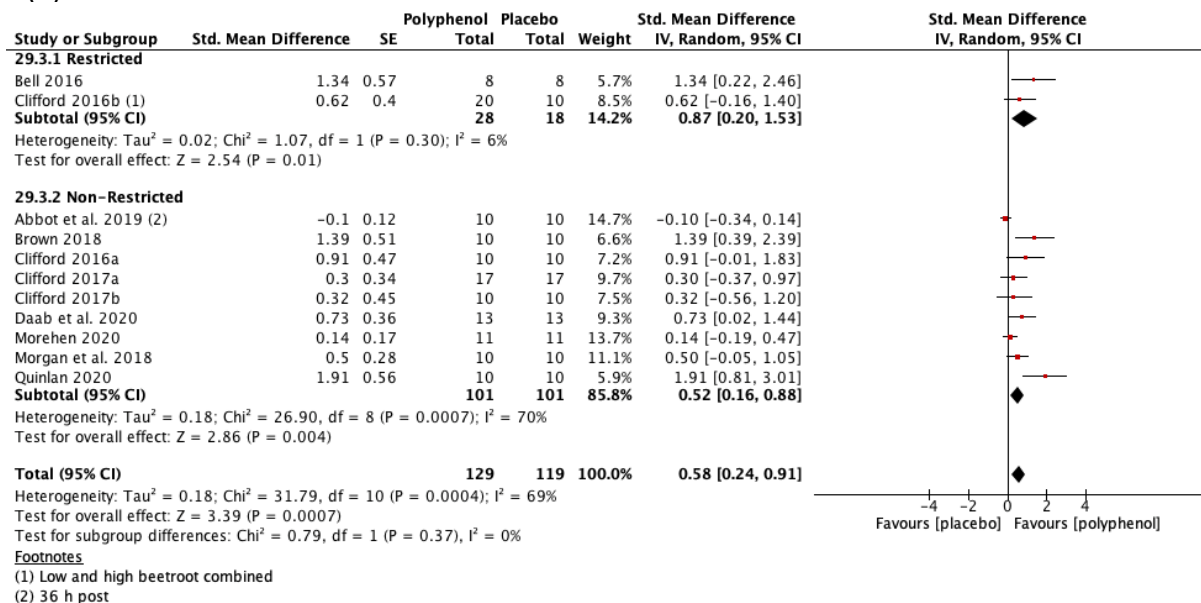

(C)

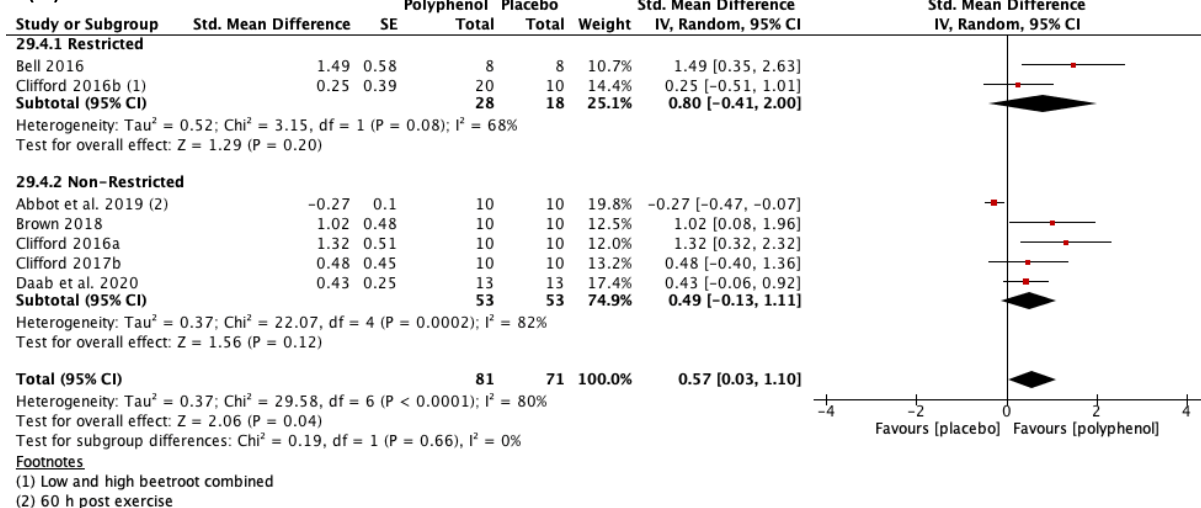

Supplementary Figure 10c. Comparison of studies based on restriction of dietary polyphenol intake: The effect of polyphenol-rich foods, juices and concentrates on counter movement jump (A) 24 hours; (B) 48 hours; (C) 72 hours.
