# Supplementary material for: Effect of Polyphenol-Rich Foods, Juices, and Concentrates on Recovery from Exercise Induced Muscle Damage: A Systematic Review and Meta-Analysis
Source: MDPI journal article supplement (doi:10.3390/nu13092988), 2021-08-27
Supplement: s1 [file s1]

(A)

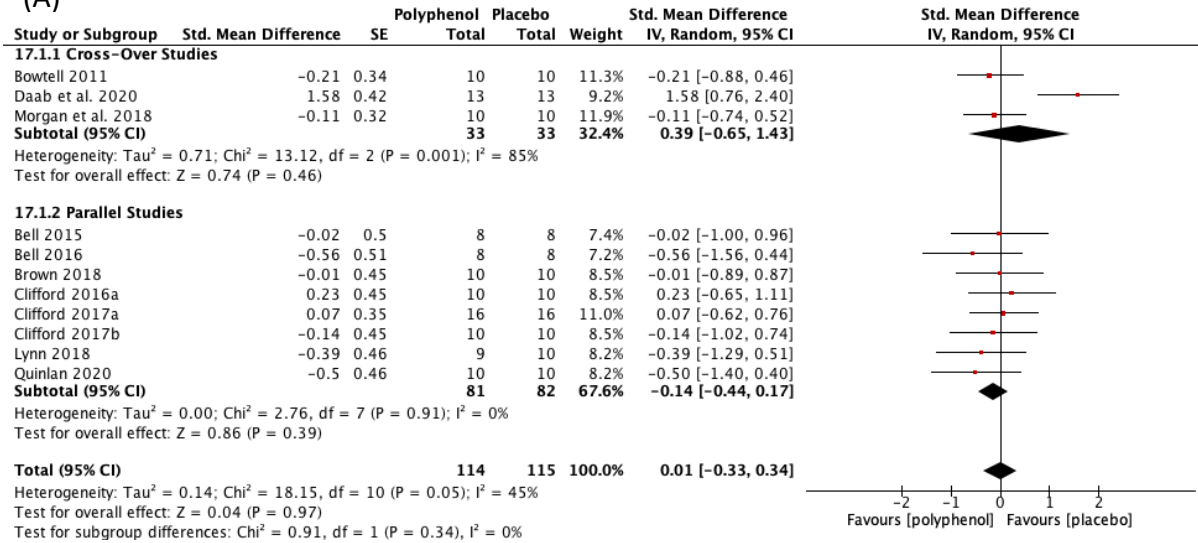

(B)

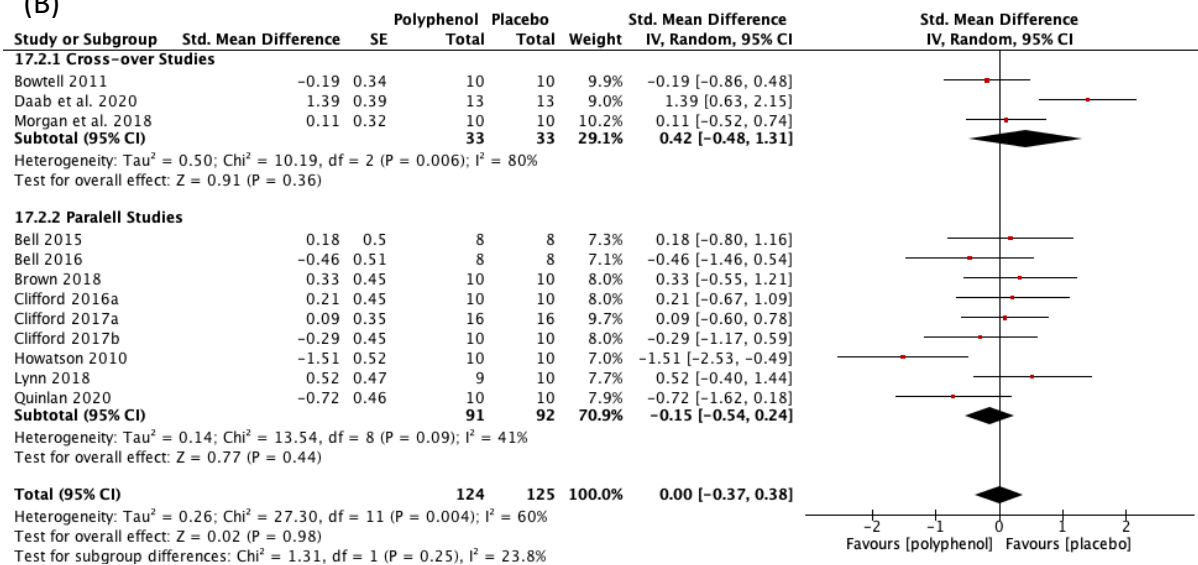

(C)

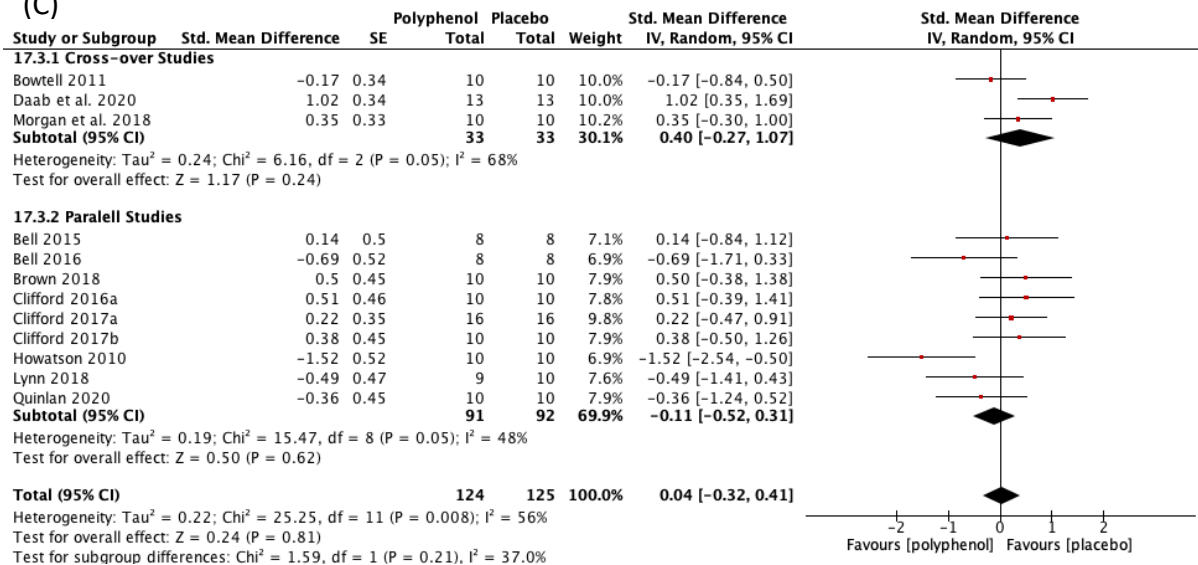

(D)

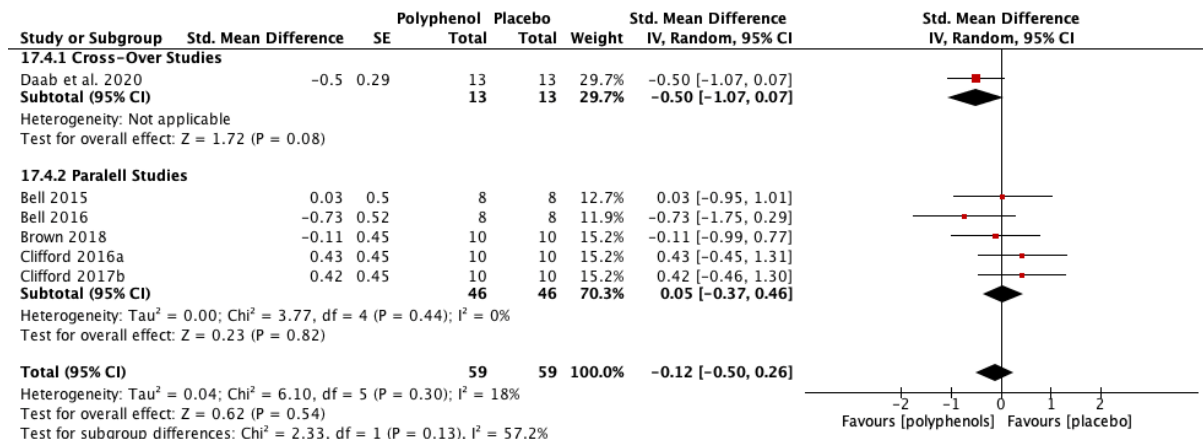

Supplementary Figure 6. Effect of polyphenol-rich foods, juices and concentrates on c-reactive protein (A) immediately post-exercise; (B) 24 hours; (C) 48 hours; (D) 72 hours.
