# Supplementary material for: Effect of Polyphenol-Rich Foods, Juices, and Concentrates on Recovery from Exercise Induced Muscle Damage: A Systematic Review and Meta-Analysis
Source: Nutrients. 2021 Aug 27;13(9):2988. doi: 10.3390/nu13092988 (PMC8465563; doi:10.3390/nu13092988)
Supplement: Supplementary file 1 [file nutrients-13-02988-s001.zip]

Archive with 10 entries (10 files):
- Supplementary Fie 1 Database search strategies.pdf
- Supplementary File 10 Polyphenol restriction_edited.pdf
- Supplementary File 2 Funnel Plots.pdf
- Supplementary File 3 GRADE_Edited.pdf
- Supplementary File 4 Sensitivity Analysis_Edited.pdf
- Supplementary File 5 CK Forest Plot_edited.pdf
- Supplementary File 6 CRP Forest Plot-edited.pdf
- Supplementary File 7 IL-6 Forest Plot_edited.pdf
- Supplementary File 8 PC Forest Plot_edited.pdf
- Supplementary File 9 Analyses by individual polyphenol rich foods_edited.pdf
